# Supplementary material for: Application of a reversible thermochromic Co-MOF in smart windows
Source: Royal Society of Chemistry journal article supplement (doi:10.1039/d4dt03423f), 2025-01-01
Supplement: d4dt03423f1.pdf [file d4dt03423f1.pdf]

## Supporting information

### **Application of reversible thermochromic Co-MOF in smart windows**

Xuan Yang,<sup>a</sup> Zesen Yu,<sup>a</sup> Hedong Jiang,<sup>a</sup> Huanhuan Guo,<sup>a</sup> Jian Sun,<sup>a</sup> Jiake Li,<sup>a</sup> Hua Zhu,<sup>b</sup>

Yanxiang Wang,<sup>a</sup> and Pingchun Guo <sup>\*a</sup>

<sup>a</sup> Address here School of Materials Science and Engineering, Jingdezhen Ceramic University, Jiangxi 333001, China.

<sup>b</sup> School of Mechanical and Electrical Engineering, Jingdezhen Ceramic University, Jiangxi 333001, China.

**Cobalt acetate/PVB film preparation:** A suspension was prepared by dispersing 75 mg of cobalt(II) acetate tetrahydrate powder in 0.5 mL DMF using bath sonication for 10 min. Subsequently, 4 g of PVB solution (7.5 wt% in DMF) was added to the cobalt(II) acetate tetrahydrate suspension. The mixture was subjected to 90 min of ultrasonic bath sonication, followed by overnight stirring. Co(OAc)<sub>2</sub>/PVB film were produced by casting the suspension onto ITO glass slides, evaporating the solvent at 40 °C.

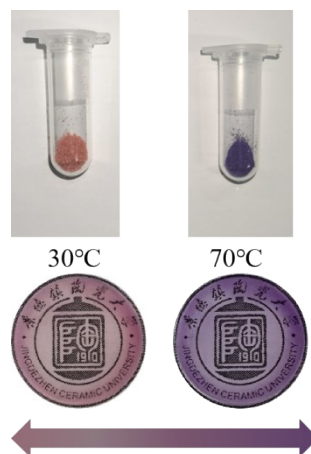

**Fig. S1.** The photographs of cobalt acetate/PVB film at different temperatures under 73% relative humidity.

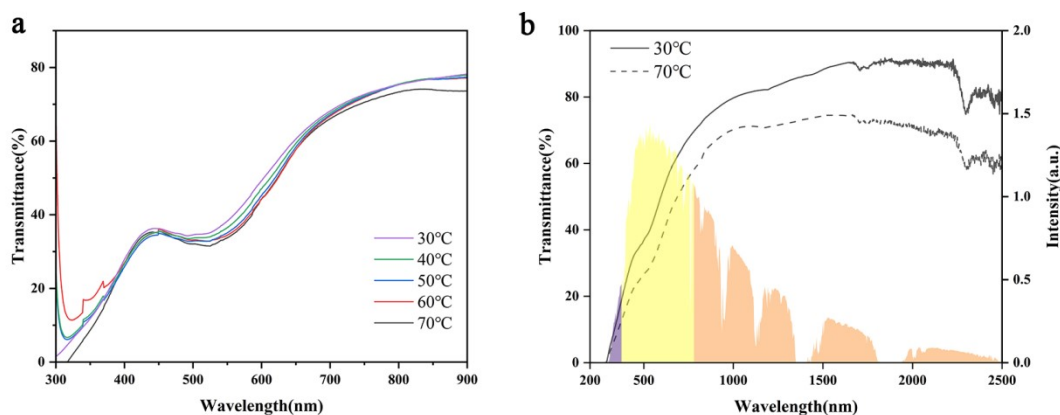

**Fig. S2.** (a) The UV-vis spectra of the cobalt acetate/PVB film at various temperatures under 70% relative humidity. (b) The UV-vis-NIR transmission spectra of cobalt acetate/PVB window at different temperatures. The purple-yellow-orange area indicates the normalized values of the UV (purple), visible (yellow), and NIR (orange) spectra spectral irradiance.

**Table S1** Optical properties of cobalt acetate/PVB window at 30 °C and 70 °C.

| Sample                    | T <sub>sol</sub><br>(%) |       | ΔT <sub>sol</sub><br>(%) | T <sub>vis</sub><br>(%) |       | ΔT <sub>vis</sub><br>(%) | T <sub>NIR</sub><br>(%) |       | ΔT <sub>NIR</sub><br>(%) |
|---------------------------|-------------------------|-------|--------------------------|-------------------------|-------|--------------------------|-------------------------|-------|--------------------------|
|                           | 30°C                    | 70°C  |                          | 30°C                    | 70°C  |                          | 30°C                    | 70°C  |                          |
| cobalt acetate/PVB window | 56.71                   | 45.89 | 10.82                    | 46.72                   | 35.47 | 11.25                    | 80.29                   | 67.32 | 12.97                    |
